# Supplementary material for: Relationships between starch synthase I and branching enzyme isozymes determined using double mutant rice lines
Source: Springer Nature journal article supplement (doi:10.1186/1471-2229-14-80), 2014-03-26
Supplement: 12870_2013_1491_MOESM1_ESM.pdf [file 12870_2013_1491_MOESM1_ESM.pdf]

WT  
(*SSISSI/BE1BE1/BE2bBE2b*)

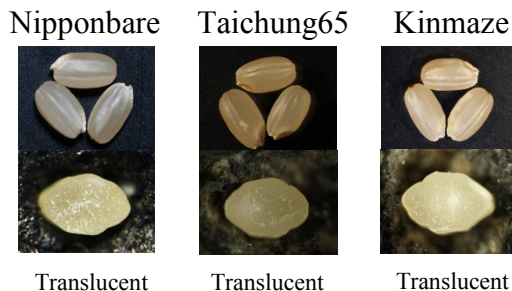

P *ssl (e7)* × *bel (EM557)*  
(*sslssl/BE1BE1*)      (*SSISSI/belbel*)

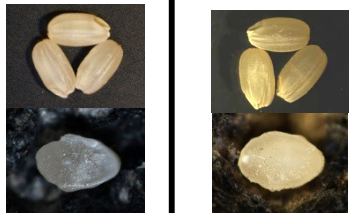

F<sub>1</sub> *SSIssl/BE1bel* ⊗ *SSIssl/BE1bel*

F<sub>2</sub> [*SSI/BE1*]:[*SSIbel*]:[*ssl/BE1*]:[*sslbel*]  
Double recessive

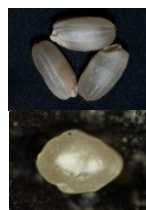

- Immuno-blotting
- Native-PAGE/ activity staining

*ssl (e7)* × *be2b (EM10)*  
(*sslssl/BE2bBE2b*)      (*SSISSI/be2bbe2b*)

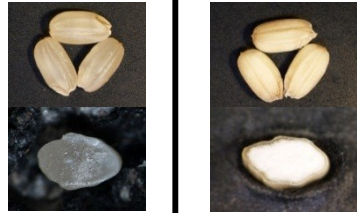

F<sub>1</sub> *SSIssl/BE2bbe2b* ⊗ *SSIssl/BE2bbe2b*

F<sub>2</sub> [*SSI/BE2b*]:[*SSIbe2b*]:[*ssl/BE2b*]:[*sslbe2b*]  
Double recessive

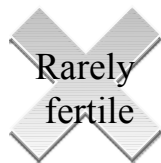

- Opaque seeds
- Immuno-blotting

*ssl<sup>L</sup> (i2-1)* × *be2b (EM10)*  
(*ssl<sup>L</sup>ssl<sup>L</sup>/BE2bBE2b*)      (*SSISSI/be2bbe2b*)

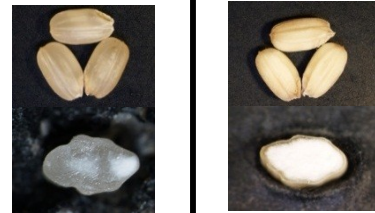

F<sub>1</sub> *SSIssl<sup>L</sup>/BE2bbe2b* ⊗ *SSIssl<sup>L</sup>/BE2bbe2b*

F<sub>2</sub> [*SSI/BE2b*]:[*SSIbe2b*]:[*ssl<sup>L</sup>/BE2b*]:[*ssl<sup>L</sup>be2b*]  
Double recessive

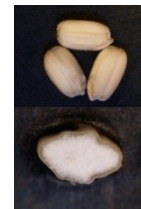

- Opaque seeds
- Native-PAGE/ activity staining
- Immuno-blotting
