# Supplementary material for: Relationships between starch synthase I and branching enzyme isozymes determined using double mutant rice lines
Source: Springer Nature journal article supplement (doi:10.1186/1471-2229-14-80), 2014-03-26

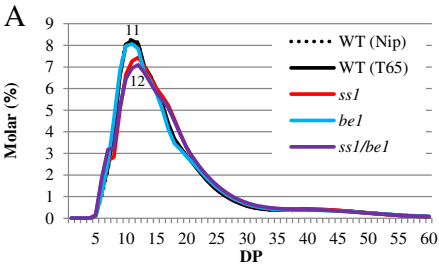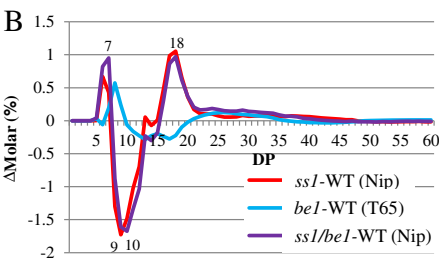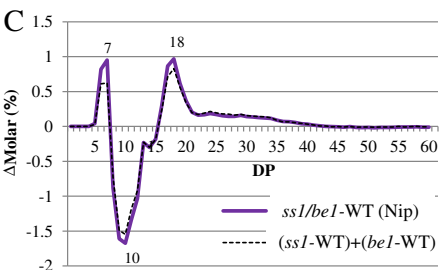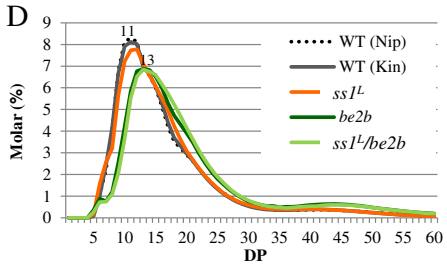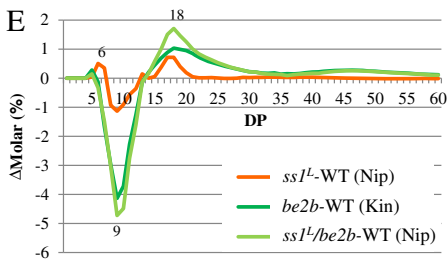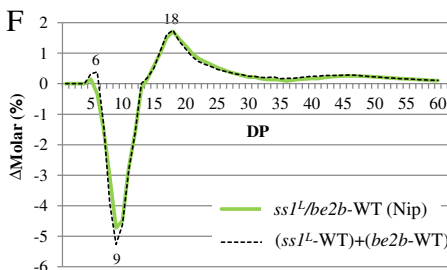

Supplement: 12870_2013_1491_MOESM4_ESM.pdf [file 12870_2013_1491_MOESM4_ESM.pdf]
