# Supplementary material for: Relationships between starch synthase I and branching enzyme isozymes determined using double mutant rice lines
Source: Springer Nature journal article supplement (doi:10.1186/1471-2229-14-80), 2014-03-26

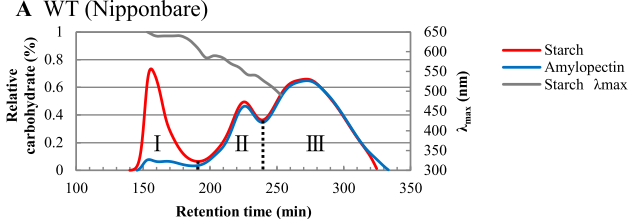

**B** WT (Taichung 65)

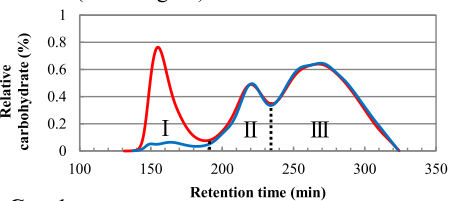

**F** WT (Kinmaze)

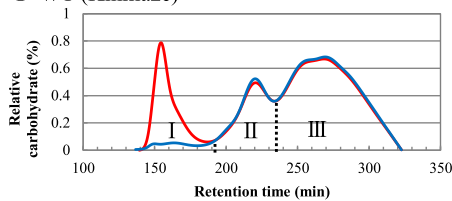

**C** *ssl*

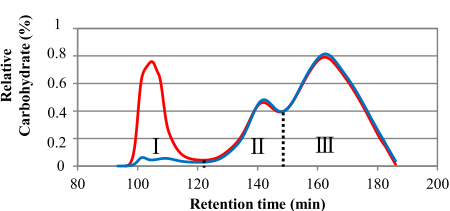

**G** *ssl<sup>L</sup>*

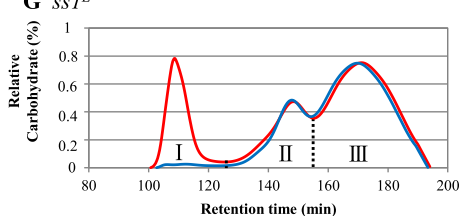

**D** *bel*

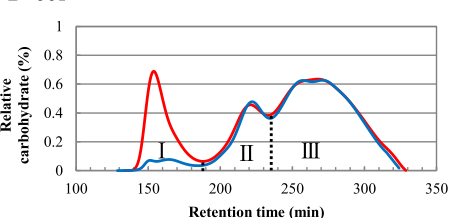

**H** *be2b*

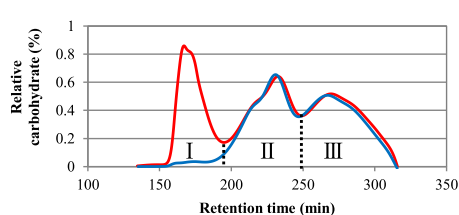

**E** *ssl/bel*

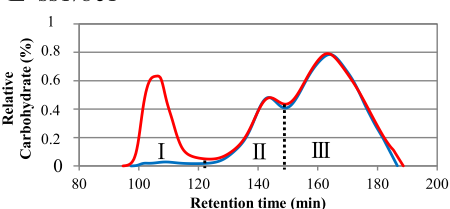

**I** *ssl<sup>L</sup>/be2b*

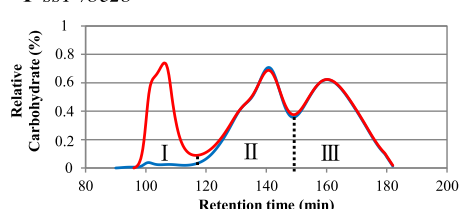

Supplement: 12870_2013_1491_MOESM5_ESM.pdf [file 12870_2013_1491_MOESM5_ESM.pdf]
